# Supplementary material for: MTL–Independent Phenotypic Switching in Candida tropicalis and a Dual Role for Wor1 in Regulating Switching and Filamentation
Source: PLoS Genet. 2013 Mar 21;9(3):e1003369. doi: 10.1371/journal.pgen.1003369 (PMC3605238; doi:10.1371/journal.pgen.1003369)
Supplement: Table S8 — List of a/α genes up regulated in the white state relative to Δ/Δwor1 mutants. (XLSX) [file pgen.1003369.s013.xlsx]

## Sheet: S8-Up in White vs. WOR1 KO
Gene Name	Fold Change - KO / W	SC5314 orf	Gene Alias
CTRG_00038	0.338887	0	0
CTRG_00077	0.207312	0	0
CTRG_00289	0.422933	0	0
CTRG_00296	0.272769	0	0
CTRG_00330	0.42286	0	0
CTRG_00368	0.453956	0	0
CTRG_00379	0.535191	orf19.499	0
CTRG_00409	0.414049	0	0
CTRG_00457	0.51862	orf19.2809	CTN3
CTRG_00478	0.528463	orf19.1321	HWP1
CTRG_00508	0.370039	orf19.2671	0
CTRG_00569	0.500087	orf19.5288	IFE2
CTRG_00628	0.475536	orf19.3871	DAD3
CTRG_00656	0.588504	orf19.457	UBP2
CTRG_00658	0.62023	orf19.459	ADP1
CTRG_00811	0.389177	0	0
CTRG_00858	0.37027	orf19.2581	0
CTRG_00863	0.272131	0	0
CTRG_00882	0.607361	orf19.2608	ADH5
CTRG_00915	0.616052	orf19.3742	0
CTRG_01001	0.596771	orf19.3278	GSY1
CTRG_01002	0.646288	orf19.3283	OAR1
CTRG_01142	0.376507	orf19.2046	POT1-2
CTRG_01170	0.286926	0	0
CTRG_01207	0.2899	orf19.855	0
CTRG_01497	0.456125	orf19.4105	0
CTRG_01692	0.31192	0	0
CTRG_01878	0.515038	orf19.4092	0
CTRG_01904	0.475494	0	0
CTRG_01949	0.485485	orf19.3608	MSH3
CTRG_01984	0.391341	0	0
CTRG_02003	0.45086	orf19.1382	YEA4
CTRG_02102	0.522046	orf19.5615	AYR2
CTRG_02376	0.536351	orf19.1653	0
CTRG_02420	0.384685	0	0
CTRG_02528	0.549427	orf19.5974	ATG9
CTRG_02532	0.306084	orf19.5978	FZD6
CTRG_02545	0.431146	orf19.258	0
CTRG_02550	0.518261	orf19.271	ADH4
CTRG_02613	0.239816	0	0
CTRG_02661	0.514948	orf19.3487	0
CTRG_02690	0.356815	orf19.2641	ARP1
CTRG_02802	0.627201	orf19.5514	0
CTRG_02926	0.569987	0	0
CTRG_03057	0.515038	orf19.6133	PIF1
CTRG_03098	0.547811	orf19.6431	0
CTRG_03207	0.3942	0	0
CTRG_03235	0.522861	orf19.4742	0
CTRG_03307	0.447047	orf19.4880	YFW5
CTRG_03323	0.291688	orf19.4901	0
CTRG_03345	0.391138	orf19.4884	WOR1
CTRG_03352	0.410158	orf19.4873	0
CTRG_03398	0.297714	0	0
CTRG_03492	0.313747	orf19.1167	TCD1
CTRG_03557	0.487424	orf19.6351	0
CTRG_03602	0.439139	0	0
CTRG_03688	0.184004	0	0
CTRG_03751	0.494057	orf19.3113	0
CTRG_03922	0.390596	orf19.3813	0
CTRG_04133	0.564091	orf19.4780	0
CTRG_04166	0.397327	0	0
CTRG_04167	0.50698	0	0
CTRG_04261	0.389177	0	0
CTRG_04421	0.411225	orf19.3308	STB5
CTRG_04478	0.612805	orf19.769	IFE1
CTRG_04584	0.633098	0	0
CTRG_04602	0.37716	orf19.4526	HSP30
CTRG_04816	0.435955	orf19.2481	0
CTRG_04884	0.377553	orf19.7013	0
CTRG_04904	0.178965	0	0
CTRG_05026	0.619317	orf19.6476	0
CTRG_05172	0.472947	orf19.6530	0
CTRG_05368	0.41301	orf19.1955	SHR5
CTRG_05451	0.356013	0	0
CTRG_05697	0.298541	orf19.7456	0
CTRG_05845	0.414301	0	0
CTRG_05944	0.579347	0	0
CTRG_05990	0.586519	orf19.4286	0
